# Supplementary material
Source: PubMed Central journal article supplement (PMC10999056)
Supplement: NIHMS1973353-supplement-SupplementaryMaterials.pdf [file NIHMS1973353-supplement-SupplementaryMaterials.pdf]

# Supplementary Material

## Partial Least Squares Regression Analysis of Alzheimer's Disease Biomarkers, Modifiable Health Variables, and Cognitive Change in Older Adults with Mild Cognitive Impairment

Supplementary Figure 1. Pseudo-scrree plots per model.

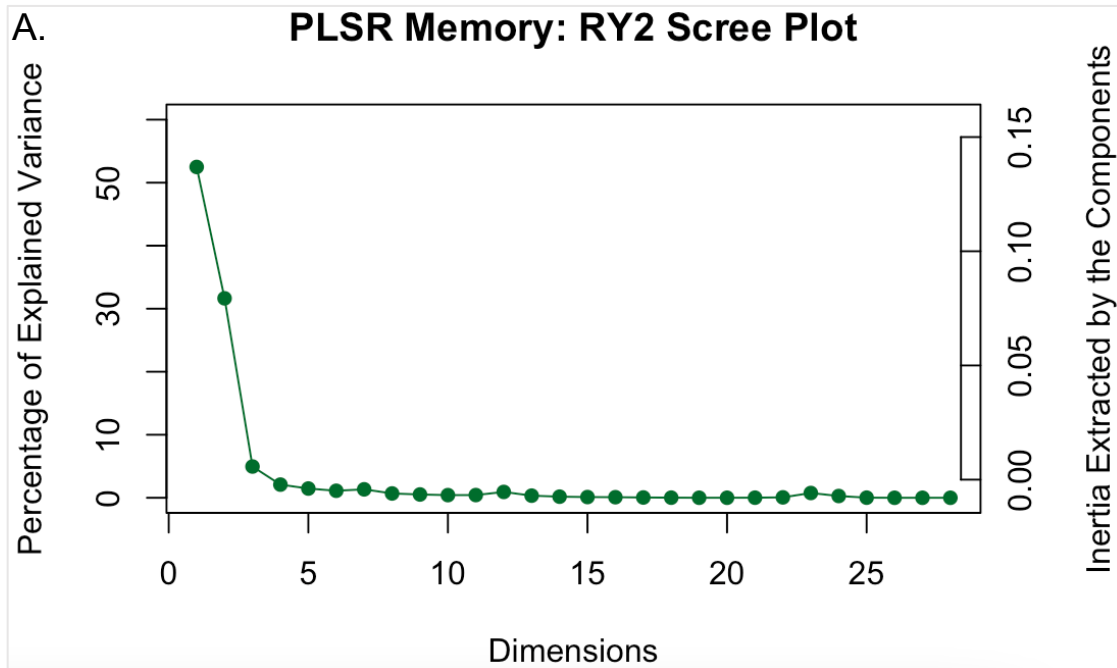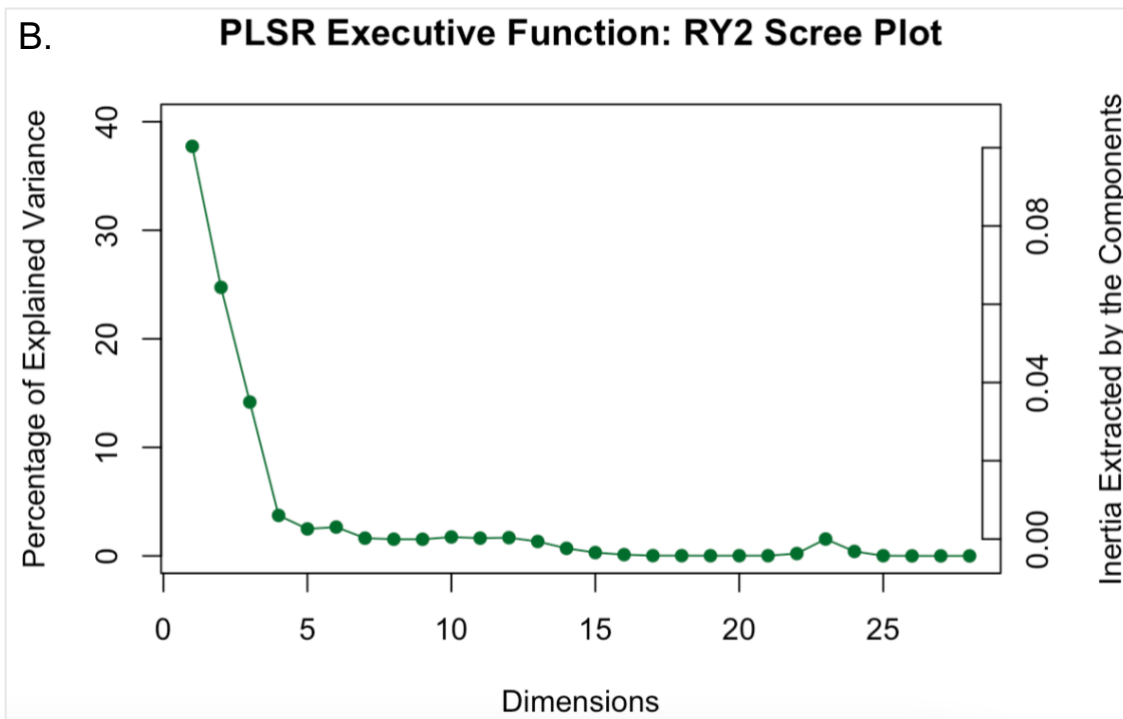

**Supplementary Table 1.** Variable Importance on Projection (VIP) Scores and B<sub>PLS</sub> Values with 95% Confidence Intervals Per Model for all input variables. VIP Scores represent whether a given input variable is an important predictor in the PLSR model (across all components). Variables with a VIP score > 1 (highlighted in yellow) are considered important to the PLS model's prediction. B<sub>PLS</sub> values are conceptually equivalent to regression coefficients in multiple linear regression and indicate the strength and directionality for each X-matrix variable in relation to the Y-outcome. B<sub>PLS</sub> values are significant if their 95% confidence interval does not cross zero (highlighted in blue).

| Variable Name                                                             | Episodic Memory Model |                              | Executive Function Model |                              |
|---------------------------------------------------------------------------|-----------------------|------------------------------|--------------------------|------------------------------|
|                                                                           | VIP Score             | BPLS Value [95% CI]          | VIP Score                | BPLS Value [95% CI]          |
| Body Mass Index                                                           | 0.56                  | 0.08 [-0.10 – 0.25]          | 0.70                     | 0.09 [-0.10 – 0.28]          |
| Seated Systolic Blood Pressure                                            | 0.15                  | <0.01 [-0.14 – 0.15]         | <b>1.16</b>              | -0.15 [-0.33 – 0.04]         |
| Seated Diastolic Blood Pressure                                           | 0.58                  | -0.04 [-0.16 – 0.09]         | <b>1.28</b>              | 0.10 [-0.07 – 0.27]          |
| Seated Pulse Rate                                                         | 0.48                  | -0.05 [-0.19 – 0.09]         | 0.47                     | 0.01 [-0.16 – 0.18]          |
| Serum Glucose                                                             | 0.94                  | -0.09 [-0.28 – 0.10]         | 0.89                     | 0.04 [-0.09 – 0.18]          |
| Triglycerides                                                             | 0.33                  | 0.02 [-0.11 – 0.16]          | 0.92                     | -0.11 [-0.29 – 0.07]         |
| Cholesterol                                                               | 0.49                  | -0.05 [-0.23 – 0.12]         | <b>1.57</b>              | -0.17 [-0.35 – 0.01]         |
| Insulin* <sup>+</sup>                                                     | 0.66                  | 0.09 [-0.07 – 0.25]          | 0.98                     | 0.08 [-0.11 – 0.26]          |
| C-reactive Protein* <sup>+</sup>                                          | 0.53                  | -0.01 [-0.19 – 0.18]         | 0.77                     | -0.07 [-0.24 – 0.10]         |
| Cortisol* <sup>+</sup>                                                    | 0.29                  | -0.01 [-0.15 – 0.13]         | 0.48                     | -0.04 [-0.21 – 0.13]         |
| Interleukin-6 Receptor* <sup>+</sup>                                      | <b>1.43</b>           | 0.15 [-0.07 – 0.38]          | 0.92                     | 0.11 [-0.08 – 0.29]          |
| Insulin-like Growth Factor Binding Protein* <sup>+</sup>                  | 0.51                  | -0.07 [-0.25 – 0.11]         | 0.56                     | 0.01 [-0.17 – 0.18]          |
| Brain-derived Neurotrophic Factor* <sup>+</sup>                           | <b>1.03</b>           | -0.10 [-0.23 – 0.04]         | 0.64                     | -0.06 [-0.19 – 0.08]         |
| Vascular Endothelial Growth Factor* <sup>+</sup>                          | <b>1.25</b>           | -0.13 [-0.32 – 0.06]         | 0.71                     | -0.08 [-0.25 – 0.09]         |
| Epidermal Growth Factor* <sup>+</sup>                                     | 0.62                  | -0.04 [-0.15 – 0.08]         | 0.57                     | 0.03 [-0.11 – 0.18]          |
| Heparin-binding Epidermal- Growth-Factor-like Growth Factor* <sup>+</sup> | 0.80                  | 0.11 [-0.01 – 0.23]          | <b>1.01</b>              | 0.11 [-0.04 – 0.27]          |
| Hepatocyte Growth Factor* <sup>+</sup>                                    | 0.25                  | -0.02 [-0.18 – 0.16]         | 0.30                     | 0.02 [-0.17 – 0.20]          |
| Platelet-derived Growth Factor BB* <sup>+</sup>                           | 0.37                  | 0.01 [-0.09 – 0.10]          | 0.50                     | <0.01 [-0.10 – 0.10]         |
| Apolipoprotein E* <sup>+</sup>                                            | 0.16                  | 0.03 [-0.14 – 0.20]          | 0.93                     | 0.02 [-0.15 – 0.18]          |
| Tau <sup>+</sup>                                                          | 0.78                  | 0.06 [-0.18 – 0.30]          | <b>1.40</b>              | 0.16 [-0.08 – 0.39]          |
| Aβ <sub>1-42</sub> (CSF)                                                  | <b>1.70</b>           | <b>0.15 [0.01 – 0.29]</b>    | <b>1.27</b>              | 0.07 [-0.13 – 0.27]          |
| Total tau (CSF)                                                           | <b>1.46</b>           | <0.01 [-0.13 – 0.13]         | <b>1.25</b>              | <0.01 [-0.11 – 0.12]         |
| P-tau <sub>181</sub> (CSF)                                                | <b>1.55</b>           | 0.03 [-0.06 – 0.12]          | <b>1.42</b>              | 0.04 [-0.06 – 0.15]          |
| P-tau <sub>181</sub> /Aβ <sub>1-42</sub>                                  | <b>1.73</b>           | -0.08 [-0.16 – 0.01]         | <b>1.53</b>              | -0.09 [-0.20 – 0.02]         |
| Total tau/Aβ <sub>1-42</sub>                                              | <b>1.83</b>           | <b>-0.11 [-0.19 – -0.03]</b> | <b>1.70</b>              | <b>-0.14 [-0.25 – -0.03]</b> |
| Is APOE ε4 Positive                                                       | <b>1.21</b>           | -0.05 [-0.14 – 0.06]         | <b>1.03</b>              | 0.04 [-0.08 – 0.15]          |
| Is APOE ε4 Negative                                                       | <b>1.21</b>           | 0.05 [-0.06 – 0.14]          | <b>1.03</b>              | -0.04 [-0.15 – 0.08]         |
| Age                                                                       | 0.45                  | -0.05 [-0.19 – 0.10]         | 0.44                     | 0.03 [-0.13 – 0.19]          |
| Education                                                                 | <b>1.54</b>           | <b>0.17 [0.01 – 0.34]</b>    | 0.30                     | -0.03 [-0.20 – 0.14]         |

\*these values are normalized; +plasma levels

VIP scores > 1 are **bold and highlighted in yellow**

BPLS values with 95% CIs that do not cross 0 are **bold and highlighted in blue**

**Supplementary Table 2.** Descriptive statistics for physiological and demographic predictor variables by gender.

| <b>Descriptive Statistics for Physiological and Demographic Variables Per Gender</b> |                          |                        |                            |
|--------------------------------------------------------------------------------------|--------------------------|------------------------|----------------------------|
|                                                                                      | <b>Female<br/>(n=42)</b> | <b>Male<br/>(n=81)</b> | <b>Overall<br/>(N=123)</b> |
| <b>BMI (kg/m<sup>2</sup>)</b>                                                        |                          |                        |                            |
| Mean (SD)                                                                            | 25.4 (4.4)               | 26.4 (3.4)             | 26.1 (3.8)                 |
| <b>Systolic BP (mmHg)</b>                                                            |                          |                        |                            |
| Mean (SD)                                                                            | 138 (19.5)               | 133 (17.6)             | 134 (18.3)                 |
| <b>Diastolic BP (mmHg)</b>                                                           |                          |                        |                            |
| Mean (SD)                                                                            | 73.2 (9.5)               | 73.6 (9.3)             | 73.4 (9.4)                 |
| <b>Resting Pulse (Per Minute)</b>                                                    |                          |                        |                            |
| Mean (SD)                                                                            | 65.8 (6.8)               | 64.0 (1.3)             | 64.6 (9.2)                 |
| <b>Serum Glucose (mg/dL)</b>                                                         |                          |                        |                            |
| Mean (SD)                                                                            | 98.1 (18.1)              | 104 (38.8)             | 102 (33.3)                 |
| <b>Triglycerides (mg/dL)</b>                                                         |                          |                        |                            |
| Mean (SD)                                                                            | 147 (72.7)               | 163 (122)              | 157 (107)                  |
| <b>Cholesterol (mg/dL)</b>                                                           |                          |                        |                            |
| Mean (SD)                                                                            | 212 (41.4)               | 191 (35.9)             | 198 (38.9)                 |
| <b>Insulin (uIU/mL)</b>                                                              |                          |                        |                            |
| Mean (SD)                                                                            | 0.31 (0.31)              | 0.30 (0.32)            | 0.30 (0.31)                |
| <b>C-reactive Protein (µg/mL)</b>                                                    |                          |                        |                            |
| Mean (SD)                                                                            | 0.055 (0.48)             | 0.051 (0.45)           | 0.052 (0.46)               |
| <b>Cortisol (ng/mL)</b>                                                              |                          |                        |                            |
| Mean (SD)                                                                            | 2.16 (0.10)              | 2.16 (0.13)            | 2.16 (0.12)                |
| <b>IL-6 Receptor (ng/mL)</b>                                                         |                          |                        |                            |
| Mean (SD)                                                                            | 1.46 (0.19)              | 1.45 (0.13)            | 1.45 (0.15)                |
| <b>IGF Binding Protein (ng/mL)</b>                                                   |                          |                        |                            |
| Mean (SD)                                                                            | 2.01 (0.21)              | 1.99 (0.22)            | 2.00 (0.22)                |
| <b>BDNF (ng/mL)</b>                                                                  |                          |                        |                            |
| Mean (SD)                                                                            | 0.36 (0.37)              | 0.25 (0.36)            | 0.28 (0.36)                |
| <b>VEGF (pg/mL)</b>                                                                  |                          |                        |                            |
| Mean (SD)                                                                            | 2.81 (0.18)              | 2.80 (0.10)            | 2.80 (0.13)                |
| <b>Epidermal Growth Factor (pg/mL)</b>                                               |                          |                        |                            |
| Mean (SD)                                                                            | 1.61 (0.55)              | 1.51 (0.59)            | 1.54 (0.58)                |

### Descriptive Statistics for Physiological and Demographic Variables Per Gender

|                                               | Female<br>( <i>n</i> =42) | Male<br>( <i>n</i> =81) | Overall<br>( <i>N</i> =123) |
|-----------------------------------------------|---------------------------|-------------------------|-----------------------------|
| <b>HB-EGF-like-GF (pg/mL)</b>                 |                           |                         |                             |
| Mean (SD)                                     | 1.92 (0.29)               | 1.92 (0.39)             | 1.92 (0.36)                 |
| <b>Hepatocyte Growth Factor (ng/mL)</b>       |                           |                         |                             |
| Mean (SD)                                     | 0.57 (0.10)               | 0.60 (0.09)             | 0.59 (0.10)                 |
| <b>Platelet-Derived Growth Factor (pg/mL)</b> |                           |                         |                             |
| Mean (SD)                                     | 3.21 (0.41)               | 3.16 (0.45)             | 3.18 (0.44)                 |
| <b>Plasma apoE (μg/mL)</b>                    |                           |                         |                             |
| Mean (SD)                                     | 1.72 (0.19)               | 1.66 (0.14)             | 1.68 (0.16)                 |
| <b>Plasma Tau (pg/mL)</b>                     |                           |                         |                             |
| Mean (SD)                                     | 2.79 (1.31)               | 2.88 (2.05)             | 2.85 (1.82)                 |
| <b>CSF Aβ<sub>1-42</sub> (pg/mL)</b>          |                           |                         |                             |
| Mean (SD)                                     | 694 (280)                 | 756 (368)               | 735 (340)                   |
| <b>CSF t-tau (pg/mL)</b>                      |                           |                         |                             |
| Mean (SD)                                     | 347 (120)                 | 289 (117)               | 309 (121)                   |
| <b>CSF p-tau (pg/mL)</b>                      |                           |                         |                             |
| Mean (SD)                                     | 35.0 (14.1)               | 28.5 (13.1)             | 3.7 (13.7)                  |
| <b>CSF p-tau/Aβ<sub>1-42</sub> (Ratio)</b>    |                           |                         |                             |
| Mean (SD)                                     | 0.06 (0.03)               | 0.05 (0.03)             | 0.05 (0.031)                |
| <b>CSF t-tau/Aβ<sub>1-42</sub> (Ratio)</b>    |                           |                         |                             |
| Mean (SD)                                     | 0.58 (0.29)               | 0.47 (0.26)             | 0.51 (0.28)                 |
| <b>Age (y)</b>                                |                           |                         |                             |
| Mean (SD)                                     | 71.5 (7.4)                | 75.1 (7.4)              | 73.9 (7.6)                  |
| <b>Education (y)</b>                          |                           |                         |                             |
| Mean (SD)                                     | 15.1 (3.0)                | 16.4 (2.9)              | 16.0 (3.0)                  |

BDNF, brain-derived neurotrophic factor; BMI, body mass index; BP, blood pressure; CSF, cerebrospinal fluid; HB-EGF-like-GF, heparin-binding epidermal growth factor like-growth factor; IL6, interleukin-6; IGF, insulin-like growth factor; p-tau, phosphorylated tau<sub>181</sub>; t-tau, total tau; VEGF, vascular endothelial growth factor.

**Supplementary Table 3.** Descriptive statistics for baseline physiological and demographic predictor variables by diagnostic status at two-year follow-up.

| <b>Descriptive Statistics for Physiological and Demographic Variables<br/>Per Diagnostic Status at 2-Year Follow-Up</b> |                                        |                                   |                                   |
|-------------------------------------------------------------------------------------------------------------------------|----------------------------------------|-----------------------------------|-----------------------------------|
|                                                                                                                         | <b>Convert to AD<br/>(<i>n</i>=55)</b> | <b>Stay MCI<br/>(<i>n</i>=68)</b> | <b>Overall<br/>(<i>N</i>=123)</b> |
| <b>BMI (kg/m<sup>2</sup>)</b>                                                                                           |                                        |                                   |                                   |
| Mean (SD)                                                                                                               | 25.6 (3.5)                             | 26.4 (4.0)                        | 26.1 (3.8)                        |
| <b>Systolic BP (mmHg)</b>                                                                                               |                                        |                                   |                                   |
| Mean (SD)                                                                                                               | 139 (19.1)                             | 131 (16.9)                        | 134 (18.3)                        |
| <b>Diastolic BP (mmHg)</b>                                                                                              |                                        |                                   |                                   |
| Mean (SD)                                                                                                               | 74.0 (9.1)                             | 72.9 (9.6)                        | 73.4 (9.4)                        |
| <b>Resting Pulse (Per Minute)</b>                                                                                       |                                        |                                   |                                   |
| Mean (SD)                                                                                                               | 65.2 (9.7)                             | 64.1 (8.8)                        | 64.6 (9.2)                        |
| <b>Serum Glucose (mg/dL)</b>                                                                                            |                                        |                                   |                                   |
| Mean (SD)                                                                                                               | 106 (45.6)                             | 98.2 (17.6)                       | 102 (33.3)                        |
| <b>Triglycerides (mg/dL)</b>                                                                                            |                                        |                                   |                                   |
| Mean (SD)                                                                                                               | 161 (97.6)                             | 155 (115)                         | 157 (107)                         |
| <b>Cholesterol (mg/dL)</b>                                                                                              |                                        |                                   |                                   |
| Mean (SD)                                                                                                               | 201 (36.3)                             | 196 (41.1)                        | 198 (38.9)                        |
| <b>Insulin (uIU/mL)</b>                                                                                                 |                                        |                                   |                                   |
| Mean (SD)                                                                                                               | 0.28 (0.32)                            | .32 (.31)                         | 0.30 (0.31)                       |
| <b>C-reactive Protein (µg/mL)</b>                                                                                       |                                        |                                   |                                   |
| Mean (SD)                                                                                                               | -0.03 (0.40)                           | .12 (.49)                         | 0.05 (0.46)                       |
| <b>Cortisol (ng/mL)</b>                                                                                                 |                                        |                                   |                                   |
| Mean (SD)                                                                                                               | 2.19 (0.11)                            | 2.13 (.13)                        | 2.16 (0.12)                       |
| <b>IL-6 Receptor (ng/mL)</b>                                                                                            |                                        |                                   |                                   |
| Mean (SD)                                                                                                               | 1.42 (0.16)                            | 1.48 (.14)                        | 1.45 (0.15)                       |
| <b>IGF Binding Protein (ng/mL)</b>                                                                                      |                                        |                                   |                                   |
| Mean (SD)                                                                                                               | 2.00 (0.24)                            | 2.00 (.20)                        | 2.00 (0.22)                       |
| <b>BDNF (ng/mL)</b>                                                                                                     |                                        |                                   |                                   |
| Mean (SD)                                                                                                               | 0.25 (0.35)                            | .31 (.37)                         | 0.28 (0.36)                       |
| <b>VEGF (pg/mL)</b>                                                                                                     |                                        |                                   |                                   |
| Mean (SD)                                                                                                               | 2.80 (0.12)                            | 2.80 (.14)                        | 2.80 (0.13)                       |
| <b>Epidermal Growth Factor (pg/mL)</b>                                                                                  |                                        |                                   |                                   |

**Descriptive Statistics for Physiological and Demographic Variables  
Per Diagnostic Status at 2-Year Follow-Up**

|                                                             | <b>Convert to AD<br/>(n=55)</b> | <b>Stay MCI<br/>(n=68)</b> | <b>Overall<br/>(N=123)</b> |
|-------------------------------------------------------------|---------------------------------|----------------------------|----------------------------|
| Mean (SD)                                                   | 1.49 (0.56)                     | 1.59 (0.59)                | 1.54 (0.58)                |
| <b>HB-EGF-like-GF (pg/mL)</b>                               |                                 |                            |                            |
| Mean (SD)                                                   | 1.91 (0.38)                     | 1.93 (0.35)                | 1.92 (0.36)                |
| <b>Hepatocyte Growth Factor (ng/mL)</b>                     |                                 |                            |                            |
| Mean (SD)                                                   | 0.59 (0.09)                     | 0.60 (0.10)                | 0.59 (0.10)                |
| <b>Platelet-Derived Growth Factor (pg/mL)</b>               |                                 |                            |                            |
| Mean (SD)                                                   | 3.11 (0.43)                     | 3.23 (0.44)                | 3.18 (0.44)                |
| <b>Plasma apoE (ug/mL)</b>                                  |                                 |                            |                            |
| Mean (SD)                                                   | 1.67 (0.17)                     | 1.69 (0.15)                | 1.68 (0.16)                |
| <b>Plasma Tau (pg/mL)</b>                                   |                                 |                            |                            |
| Mean (SD)                                                   | 2.73 (1.19)                     | 2.94 (2.21)                | 2.85 (1.82)                |
| <b>CSF A<math>\beta</math><sub>1-42</sub> (pg/mL)*</b>      |                                 |                            |                            |
| Mean (SD)                                                   | 636 (240)                       | 815 (387)                  | 735 (340)                  |
| <b>CSF t-tau (pg/mL)</b>                                    |                                 |                            |                            |
| Mean (SD)                                                   | 333 (104)                       | 289 (130)                  | 309 (121)                  |
| <b>CSF p-tau (pg/mL)</b>                                    |                                 |                            |                            |
| Mean (SD)                                                   | 32.8 (11.3)                     | 29.0 (15.3)                | 3.7 (13.7)                 |
| <b>CSF p-tau/A<math>\beta</math><sub>1-42</sub> (Ratio)</b> |                                 |                            |                            |
| Mean (SD)                                                   | 0.06 (0.02)                     | 0.05 (0.04)                | 0.051 (0.03)               |
| <b>CSF t-tau/A<math>\beta</math><sub>1-42</sub> (Ratio)</b> |                                 |                            |                            |
| Mean (SD)                                                   | 0.58 (0.22)                     | 0.46 (0.31)                | 0.51 (0.28)                |
| <b>Age (y)</b>                                              |                                 |                            |                            |
| Mean (SD)                                                   | 74.3 (7.6)                      | 73.5 (7.6)                 | 73.9 (7.6)                 |
| <b>Education (y)</b>                                        |                                 |                            |                            |
| Mean (SD)                                                   | 15.5 (3.2)                      | 16.3 (2.7)                 | 16.0 (3.0)                 |
| <b>ADNI Memory Composite Score (z-score)*</b>               |                                 |                            |                            |
| Mean (SD)                                                   | -0.37 (0.46)                    | 0.07 (0.57)                | -0.13 (0.56)               |
| <b>ADNI Executive Function Composite Score (z-score)*</b>   |                                 |                            |                            |
| Mean (SD)                                                   | -0.34 (0.74)                    | 0.17 (0.80)                | -0.06 (0.81)               |

\*significant difference between groups ( $p < 0.05$ )

BDNF, brain-derived neurotrophic factor; BMI, body mass index; BP, blood pressure; CSF, cerebrospinal fluid; HB-EGF-like-GF, heparin-binding epidermal growth factor like-growth factor; IL6, interleukin-6; IGF, insulin-like growth factor; p-tau, phosphorylated tau<sub>181</sub>; t-tau, total tau; VEGF, vascular endothelial growth factor.
